# Supplementary material for: Continuing medical education in China: evidence from primary health workers’ preferences for continuing traditional Chinese medicine education
Source: Springer Nature journal article supplement (doi:10.1186/s12913-023-10153-y), 2023-11-03
Supplement: MOESM1 [file 26261444]

# Questionnaire on the Learning and Use of TCMTs among Rural and Primary Medical Workers (Version 1)

Dear Expert,

We are the research team of the National Natural Science Foundation of China project “Research on the Diffusion Incentive Mechanism of Appropriate Technologies for Traditional Chinese Medicine Based on Discrete Selection Experiments (Project No. 72074032)”. This expert consultation is mainly from the perspective of medical workers to understand your problems and needs in learning and using traditional Chinese medicine technologies (TCMTs), so as to put forward constructive opinions and suggestions for the effective promotion of TC. In this study, “appropriate health technologies” refers to a series of safe, effective, economical, and practical health and TCM appropriate technologies that are suitable for basic medical use, can be learned and used. Among them, “appropriate TCM technologies” refers to the diagnosis, treatment technologies, medical prescriptions and drug combinations that are suitable for common and frequently occurring diseases at the grass-roots level, easy to operate, and easy to be mastered and used by primary medical workers, such as acupuncture, massage, cupping, and Chinese herbal formulas and so on.

We solemnly promise that this survey is for academic research only and will not be used for other purposes. Meanwhile, the questionnaire does not involve any personal privacy, so please rest assured to fill it out. We sincerely thank you for your strong cooperation!

## Part 1: Basic information

1.1 Your gender is \_\_\_\_\_.

①male ②female

1.2 Your age is \_\_\_\_\_.

1.3 Your education level is \_\_\_\_\_.

①postgraduate ②undergraduate ③junior college ④technical secondary school and technical school ⑤high school ⑥junior high school and below

1.4 Your professional title is \_\_\_\_\_.

①senior title ②associate senior title ③intermediate title ④junior title ⑤other job title \_\_\_\_\_

1.5 Your type of practice is \_\_\_\_\_.

① conventional medicine practicing (assistant) physician ② traditional Chinese medicine practicing (assistant) physician ③ public health practicing (assistant) physician ④ practicing (assistant) nurse ⑤other \_\_\_\_\_

1.6 Your monthly income is \_\_\_\_\_ yuan.

1.7 Your expected monthly income is \_\_\_\_\_ yuan.

1.8 The type of your institution is \_\_\_\_\_.

① county hospital ② county hospital of traditional Chinese medicine ③ township hospital ④

community health service center ⑤community health service station ⑥village clinic ⑦others\_\_

1.9 Your department is \_\_\_\_\_.

① internal medicine department ② surgery department ③ traditional Chinese medicine department ④gynecology department ⑤pediatric department ⑥other department \_\_\_\_\_

1.10 You have been in this profession for \_\_\_\_\_ year (years).

1.11 Your establishment status is \_\_\_\_\_.

①within the establishment ②contract system ③temporary employment ④re-employment

1.12 You have \_\_\_\_\_ hour (hours) of free time outside of work every day, of which \_\_\_\_\_ hour (hours) are used for self-directed learning.

1.13 Your contact number is \_\_\_\_\_.

## Part 2: Appropriate health technology learning and satisfaction

2.1 Have you participated in training on appropriate health technologies in the past 3 years?

\_\_\_\_\_

①Yes (please continue to answer)

②No (please skip to question 2.8)

2.2 What appropriate health technologies training have you participated in in the past 3 years? (Multiple choices are available.) \_\_\_\_\_

① Traditional Chinese medicine technologies training ② Appropriate western medicine technologies training ③Appropriate public health technologies training ④Other (please specify)

\_\_\_\_\_

2.3 The cumulative training time is \_\_\_\_\_ day (days), of which the training time for appropriate TCM technologies is \_\_\_\_\_ day (days).

2.4 In the past 3 years, you have learned a total of \_\_\_\_\_ appropriate technology (technologies), including \_\_\_\_\_ appropriate TCM technology (technologies).

2.5 The ways of training you receive include \_\_\_\_\_. (Multiple choices are available.)

①online training ②going out for further study ③going out for centralized classes ④experts coming to the hospital for guidance ⑤other \_\_\_\_\_

2.6 How is the overall effect of your learning technology? \_\_\_\_\_

①Very good ②Relatively good ③Average ④Relatively poor ⑤Very poor

2.7 How satisfied are you with the promotion of appropriate health technologies in primary medical institutions? (Satisfaction level is represented by 11 numbers ranging from 0 to 10. 0 means very dissatisfied, and 10 means very satisfied. Please tick  $\surd$  on the scale describing your satisfaction with the promotion.)

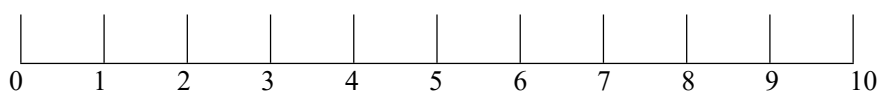

(very dissatisfied)

(very satisfied)

2.8 Whether the institution has a reward mechanism for appropriate technologies learning?

①Yes (please continue to answer) ②No (please skip to question 2.10)

2.9 What kind of reward system for appropriate technologies learning does your institution have?

(Multiple choices are available.) \_\_\_\_\_

①Bonus ②Professional title promotion ③Continuing education credits ④Other (please specify)

2.10 How much do you know about appropriate health technologies? \_\_\_\_\_

①know very well ②know more ③generally know ④do not know ⑤do not know at all

2.11 How motivated are you to learn appropriate health technologies? (The level of learning motivation is represented by 11 numbers ranging from 0 to 10. 0 indicates no willingness to learn, and 10 indicates a great willingness to learn. Please tick  $\surd$  on the scale that describes your enthusiasm for technology learning.)

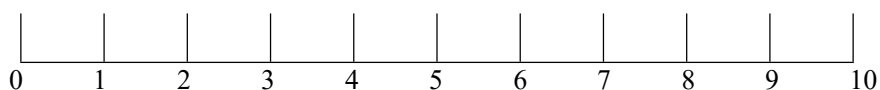

(very reluctant)

(very willing)

### Part 3: Investigation of preferences for learning TCM technologies

Suppose that you have two TCM technologies to learn now, technology A and technology B. The two technologies differ in terms of learning expenses, learning difficulty, mode of learning, type of technology, expected technology efficacy, expected frequency of use and time required to learn. In the following 7 pairs of choices, please choose the TCM technology that you prefer based on your personal preferences. When making your choice, please assume that except for the seven attributes listed, the other conditions for technology A and technology B are the same.

3.1 If you choose one of the following pairs of TCM technologies (option A and option B), which one would you prefer to learn? (Tick  $\surd$  in the box to the right of your selected technology.)

| attribute of technology | learning expenses | learning difficulty | mode of learning     | type of technology | expected technology efficacy | expected frequency of use | time required to learn | Which technology do you prefer? |
|-------------------------|-------------------|---------------------|----------------------|--------------------|------------------------------|---------------------------|------------------------|---------------------------------|
| technology A            | 0 yuan            | difficult           | on-the-job learning  | internal treatment | uncertain efficacy           | 40%                       | 14 days                |                                 |
| technology B            | 1200 yuan         | simple              | off-the-job learning | external treatment | similar to before            | 30%                       | 21 days                |                                 |

If there is a TCM technology that you tend to choose in real life, will you choose to learn it?

3.2 If you choose one of the following pairs of TCM technologies (option A and option B), which one would you prefer to learn? (Tick  $\surd$  in the box to the right of your selected technology.)

| attribute of technology | learning expenses | learning difficulty | mode of learning     | type of technology | expected technology efficacy | expected frequency of use | time required to learn | Which technology do you prefer? |
|-------------------------|-------------------|---------------------|----------------------|--------------------|------------------------------|---------------------------|------------------------|---------------------------------|
| technology A            | 500 yuan          | simple              | on-the-job learning  | external treatment | higher than before           | 40%                       | 7 days                 |                                 |
| technology B            | 0 yuan            | normal              | off-the-job learning | internal treatment | similar to before            | 20%                       | 14 days                |                                 |

If there is a TCM technology that you tend to choose in real life, will you choose to learn it?

3.3 If you choose one of the following pairs of TCM technologies (option A and option B), which one would you prefer to learn? (Tick  $\checkmark$  in the box to the right of your selected technology.)

| attribute of technology | learning expenses | learning difficulty | mode of learning     | type of technology | expected technology efficacy | expected frequency of use | time required to learn | Which technology do you prefer? |
|-------------------------|-------------------|---------------------|----------------------|--------------------|------------------------------|---------------------------|------------------------|---------------------------------|
| technology A            | 500 yuan          | difficult           | off-the-job learning | external treatment | similar to before            | 20%                       | 21 days                |                                 |
| technology B            | 800 yuan          | simple              | on-the-job learning  | internal treatment | uncertain efficacy           | 30%                       | 7 days                 |                                 |

If there is a TCM technology that you tend to choose in real life, will you choose to learn it?

3.4 If you choose one of the following pairs of TCM technologies (option A and option B), which one would you prefer to learn? (Tick  $\checkmark$  in the box to the right of your selected technology.)

| attribute of technology | learning expenses | learning difficulty | mode of learning     | type of technology | expected technology efficacy | expected frequency of use | time required to learn | Which technology do you prefer? |
|-------------------------|-------------------|---------------------|----------------------|--------------------|------------------------------|---------------------------|------------------------|---------------------------------|
| technology A            | 0 yuan            | simple              | off-the-job learning | internal treatment | higher than before           | 20%                       | 14 days                |                                 |
| technology B            | 500 yuan          | normal              | on-the-job learning  | external treatment | uncertain efficacy           | 40%                       | 21 days                |                                 |

If there is a TCM technology that you tend to choose in real life, will you choose to learn it?

3.5 If you choose one of the following pairs of TCM technologies (option A and option B), which one would you prefer to learn? (Tick  $\checkmark$  in the box to the right of your selected technology.)

| attribute of technology | learning expenses | learning difficulty | mode of learning     | type of technology | expected technology efficacy | expected frequency of use | time required to learn | Which technology do you prefer? |
|-------------------------|-------------------|---------------------|----------------------|--------------------|------------------------------|---------------------------|------------------------|---------------------------------|
| technology A            | 0 yuan            | normal              | off-the-job learning | external treatment | uncertain efficacy           | 30%                       | 7 days                 |                                 |
| technology B            | 800 yuan          | difficult           | on-the-job learning  | internal treatment | higher than before           | 40%                       | 14 days                |                                 |

If there is a TCM technology that you tend to choose in real life, will you choose to learn it?

3.6 If you choose one of the following pairs of TCM technologies (option A and option B), which one would you prefer to learn? (Tick  $\checkmark$  in the box to the right of your selected technology.)

| attribute of technology | learning expenses | learning difficulty | mode of learning     | type of technology | expected technology efficacy | expected frequency of use | time required to learn | Which technology do you prefer? |
|-------------------------|-------------------|---------------------|----------------------|--------------------|------------------------------|---------------------------|------------------------|---------------------------------|
| technology A            | 800 yuan          | normal              | on-the-job learning  | external treatment | similar to before            | 40%                       | 21 days                |                                 |
| technology B            | 500 yuan          | difficult           | off-the-job learning | internal treatment | higher than before           | 30%                       | 7 days                 |                                 |

If there is a TCM technology that you tend to choose in real life, will you choose to learn it?

3.7 If you choose one of the following pairs of TCM technologies (option A and option B), which one would you prefer to learn? (Tick  $\checkmark$  in the box to the right of your selected technology.)

| attribute of technology | learning expenses | learning difficulty | mode of learning     | type of technology | expected technology efficacy | expected frequency of use | time required to learn | Which technology do you prefer? |
|-------------------------|-------------------|---------------------|----------------------|--------------------|------------------------------|---------------------------|------------------------|---------------------------------|
| technology A            | 0 yuan            | simple              | off-the-job learning | internal treatment | higher than before           | 40%                       | 7 days                 |                                 |
| technology B            | 1200 yuan         | difficult           | off-the-job learning | internal treatment | uncertain efficacy           | 20%                       | 28 days                |                                 |

If there is a TCM technology that you tend to choose in real life, will you choose to learn it?
